# Supplementary material for: Development of a Recombinant Thermostable Newcastle Disease Virus (NDV) Vaccine Express Infectious Bronchitis Virus (IBV) Multiple Epitopes for Protecting against IBV and NDV Challenges
Source: MDPI journal article supplement (doi:10.3390/vaccines8040564), 2020-10-01
Supplement: s1 [file s1]

## Supplemental Materials

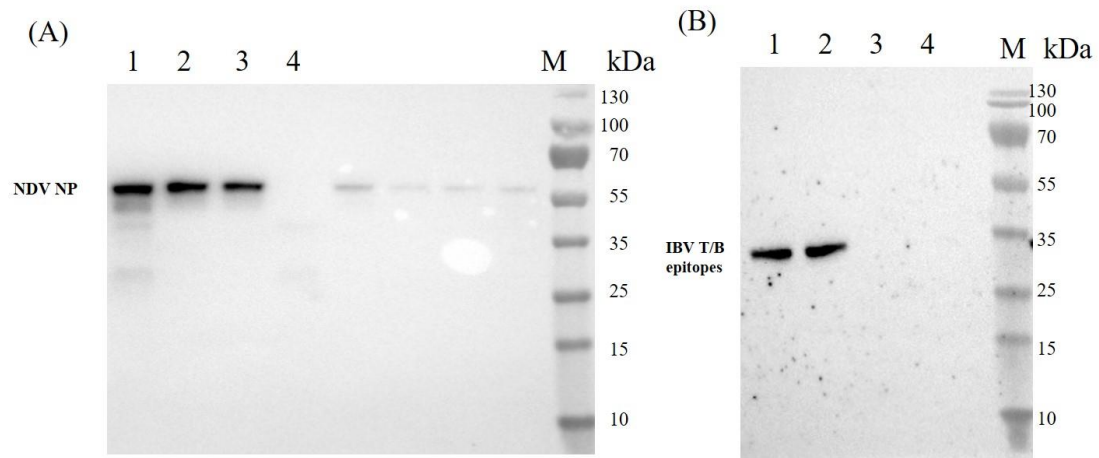

The whole blot (uncropped blots) showing all the bands with all molecular weight markers on the Western in the Supplemental Fig 1: **Antigenicity of the thermostable rLS-T-HN-T/B strain**. Western blot analysis on rLS-T-HN-T/B with NDV NP mAb (A); with IBV polyclonal antibody (B). Lane 1: 1<sup>st</sup> generation of the rLS-T-HN-T/B strain; Lane 2: 20<sup>th</sup> generation of the rLS-T-HN-T/B strain; Lane 3: LaSota strain; Lane 4: uninfected cells control.
